# Supplementary material for: Autophagy inhibition elicits emergence from metastatic dormancy by inducing and stabilizing Pfkfb3 expression
Source: PubMed Central journal article supplement (PMC6694140; doi:10.1038/s41467-019-11640-9), 2019-08-14

## **Supplementary Information**

**Autophagy inhibition elicits emergence from metastatic dormancy by inducing and stabilizing Pfkfb3 expression**

**Flynn *et al.***

**Supplementary Table 1.** PDX Models. The model number, breast cancer subtype, rate of xenograft metastasis, site of metastasis in the patient, and nodal status of the patient for each PDX model is described.

| <b>Model</b> | <b>Breast Cancer Subtype</b> | <b>Rate of xenograft metastasis</b> | <b>Patient Metastatic Site</b> | <b>Nodal Status of Patient</b> |
|--------------|------------------------------|-------------------------------------|--------------------------------|--------------------------------|
| BCM-3613     | HER2+/ER-/PR-                | 23.8%                               | Brain                          | Not reported                   |
| BCM-4664     | TNBC                         | 0%                                  | None                           | +                              |
| BCM-3963     | HER2+/ER-/PR-                | 13.6%                               | Brain                          | +                              |
| BCM-4013     | TNBC                         | 21.4%                               | None                           | +                              |
| BCM-2664     | TNBC                         | 7.1%                                | None                           | -                              |
| BCM-4913     | TNBC                         | 0%                                  | None                           | +                              |
| BCM-3887     | TNBC                         | 14.3%                               | Brain                          | -                              |
| BMC-3204     | TNBC                         | 28.6%                               | None                           | -                              |

**Supplementary Table 2.** shRNAs. The gene, catalog number from Sigma Aldrich, sequence, and the identifying shRNA number are described for each shRNA used in this study.

| <b>Gene</b>        | <b>Catalog Number</b>                   | <b>Sequence</b>                                                        | <b>shRNA designation</b> |
|--------------------|-----------------------------------------|------------------------------------------------------------------------|--------------------------|
| Atg3               | Sigma Aldrich Cat. #<br>TRCN0000247441  | 5'-CCGGTGTGACCATTGACCAT<br>ATTTACTCGAGTAAATATGGTCAAT<br>GGTCACATTTTTG  | shAtg3                   |
| Atg7               | Sigma Aldrich Cat. #<br>#TRCN0000375444 | 5'-CCGGGCCAACATCCCTGGAT<br>ACAAGCTCGAGCTTGTATCCAGGG<br>ATGTTGGCTTTTTG  | shAtg7_sh1               |
|                    | Sigma Aldrich Cat. #<br>TRCN0000305993  | 5'-CCGGGCAGTGATGACCGCA<br>TGAATGCTCGAGCATTTCATGCGGT<br>CATCACTGCTTTTTG | shAtg7_sh2               |
|                    | Sigma Aldrich Cat. #<br>TRCN0000305991  | 5'-CCGGTTCTGTCACGGTTCGA<br>TAATGCTCGAGCATTATCGAACCG<br>TGACAGAATTTTTG  | shAtg7_sh3               |
| p62/<br>SQST<br>M1 | Sigma Aldrich Cat. #<br>TRCN0000238134  | 5'-CCGGCACCTCCACCATTGT<br>GATAGCTCGAGCTATCACAATGGT<br>GGAGGGTGTTTTG    | shp62_sh1                |
|                    | Sigma Aldrich Cat. #<br>TRCN0000238135  | 5'-CCGGTGTGGTGGGAACTCG<br>CTATAACTCGAGTTATAGCGAGTT<br>CCCACCACATTTTTG  | shp62_sh2                |
| FIP200             | Sigma Aldrich Cat. #<br>TRCN0000331566  | 5'-CCGGCCAACTTTAACACAGT<br>CTTAACTCGAGTTAAGACTGTGTTA<br>AAGTTGGTTTTG   | shFIP200_sh1             |
|                    | Sigma Aldrich Cat. #<br>TRCN0000304383  | 5'-CCGGGATAATGCATACTCAA<br>CATTGCTCGAGCAATGTTGAGTAT<br>GCATTATCTTTTTG  | shFIP200_sh2             |
|                    | Sigma Aldrich Cat. #<br>TRCN0000304384  | 5'-CCGGATTGCATGCAGATAAT<br>CATAACTCGAGTTATGATTATCTGC<br>ATGCAATTTTTG   | shFIP200_sh3             |
| Pfkfb3             | Sigma Aldrich Cat. #<br>TRCN0000025418  | 5'-CCGGGTGTTCAATGTGGGA<br>GAGTATCTCGAGATACTCTCCCAC<br>ATTGAACACTTTTT   | shPfkfb3                 |

**Supplementary Table 3.** Cell Line Culture Conditions for each human and murine cell line are described.

| <b>Cell Line</b>             | <b>Base Media</b> | <b>Supplements</b>                                              |
|------------------------------|-------------------|-----------------------------------------------------------------|
| D2.HAN (D2.OR and D2.A1)     | DMEM              | 10% FBS and 1% Pen/Strep                                        |
| 4T1 Series (67NR, 4T07, 4T1) | DMEM              | 10% FBS and 1% Pen/Strep                                        |
| MDA-MB-231                   | DMEM              | 10% FBS and 1% Pen/Strep                                        |
| BT474                        | DMEM              | 10% FBS and 1% Pen/Strep                                        |
| MCF7                         | DMEM              | 10% FBS, 1 $\mu$ g/mL insulin (Sigma Aldrich) and 1% Pen/Strep  |
| T47D                         | RPMI-1640         | 10% FBS, 1 $\mu$ g/mL insulin (Sigma Aldrich), and 1% Pen/Strep |
| BT549                        | RPMI-1640         | 10% FBS, 1 $\mu$ g/mL insulin (Sigma Aldrich), and 1% Pen/Strep |
| HCC1806                      | RPMI-1640         | 10% FBS and 1% Pen/Strep                                        |

**Supplementary Table 4.** RT-PCR Primers. Gene, species, and primer sequences for each primer used in this study.

| <b>Gene Name</b> | <b>Species</b> | <b>Forward Primer</b>             | <b>Reverse Primer</b>           |
|------------------|----------------|-----------------------------------|---------------------------------|
| Pfkfb3           | Mouse          | 5'-CGGGAGAGGTCAGAG<br>AACAAACATGA | 5'-TTGGCCTCGAGAAGATGA GC        |
| PFKFB3           | Human          | 5'-GATGCCCTTCAGGAAA<br>GCCT       | 5'-TCCCCGACGTTGAACACT TT        |
| p62/<br>SQSTM1   | Human          | 5'-CTATGGCGTCGCTCAC<br>CGT        | 5'-CCGTCCTCATCGCGGTAG TG        |
| Gapdh            | Mouse          | 5'-CAACTTTGGCATTGTG<br>GAAGGGCTC  | 5'-GCAGGGATGATGTTCTGG GC<br>AGC |
| GAPDH            | Human          | 5'-TCCATGACAACTTTGGT<br>ATCGT     | 5'-AGTAGAGGCAGGGATGA<br>TGTT    |

**Supplementary Table 5.** Antibodies. The antibody, catalog number and staining condition dilution as well as the application for each antibody used in this study.

| <b>Antibody</b> | <b>Application</b>                          | <b>Dilution</b> | <b>Catalog Number</b>   |
|-----------------|---------------------------------------------|-----------------|-------------------------|
| Pfkfb3          | Western Blotting                            | 1:1000          | Abcam (ab181861)        |
| p62/<br>SQSTM1  | Western Blotting                            | 1:1000          | Abcam (ab56416)         |
| LC3B            | Western Blotting                            | 1:2500          | Novus Bio (NB100-2220)  |
| Atg3            | Western Blotting                            | 1:1000          | Cell Signaling (# 3415) |
| Atg5            | Western Blotting                            | 1:1000          | Cell Signaling (#12994) |
| Atg12           | Western Blotting                            | 1:1000          | Cell Signaling (#4180)  |
| Beclin-1        | Western Blotting                            | 1:1000          | Cell Signaling (#3495)  |
| GFP             | Western Blotting                            | 1:1000          | Abcam (ab6556)          |
| FLAG            | Western Blotting/<br>Co-immunoprecipitation | 1:750           | Sigma (#F3165)          |
| HA              | Western Blotting/<br>Co-immunoprecipitation | 1:750           | Abcam (ab16918)         |
| $\beta$ -Actin  | Western Blotting                            | 1:20,000        | Sigma                   |
| Pfkfb3          | IHC                                         | 1:250           | Abcam (ab181861)        |
| p62/<br>SQSTM1  | IHC                                         | 50 $\mu$ g/mL   | Abcam (ab91526)         |
| LC3B            | IHC                                         | 1:1000          | Novus Bio (NB100-2220)  |
| Atg3            | IHC                                         | 2.5 $\mu$ g/mL  | Thermo Fisher (720056)  |
| LC3B-<br>AF647  | Immunofluorescence                          | 1:250           | Abcam (ab225383)        |
| LAMP1-<br>Cy3   | Immunofluorescence                          | 1:150           | Abcam (ab67283)         |
| CD24-<br>BV421  | Flow cytometry                              | 1:1000          | BD (562563)             |
| CD49f-PE        | Flow cytometry                              | 1:1000          | Invitrogen (12-0495-82) |

Supplementary Figure 1: Flynn et al.

**a**

| Gene Name                                    | Gene Symbol   | Fold-change |
|----------------------------------------------|---------------|-------------|
| ABL                                          | Abl1          | 1.54        |
| Aldehyde Dehydrogenase 1 Family Member A3    | Aldh1a3       | 0.01        |
| Calreticulin                                 | Calr          | 0.48        |
| Cyclin A2                                    | Ccna2         | 1.88        |
| Cyclin B1                                    | Ccnb1         | 3.73        |
| Cyclin E1                                    | Ccne1         | 2.94        |
| CD44                                         | CD44          | 0.61        |
| Cell Division Cycle 25C                      | Cdc25c        | 2.28        |
| Cyclin-dependent Kinase 2                    | Cdk2          | 2.10        |
| Cyclin-dependent Kinase 4                    | Cdk4          | 2.23        |
| Cyclin-dependent Kinase Inhibitor 1          | Cdkn1a        | 0.30        |
| Checkpoint Kinase 1                          | Chek1         | 4.03        |
| Checkpoint Kinase 2                          | Chek2         | 1.78        |
| Cbp/p300-interacting Transactivator 2        | Cited2        | 6.10        |
| Collagen type 1, alpha 1                     | Col1a1        | 0.01        |
| Collagen type 3, alpha 1                     | Col3a1        | 0.31        |
| Cellular Repressor of E1A-stimulated Genes 1 | Creg1         | 4.02        |
| E2F Transcription Factor 1                   | E2f1          | 3.63        |
| E2F Transcription Factor 3                   | E2f3          | 1.75        |
| Early Growth Response Protein 1              | Egr1          | 0.37        |
| Ets2                                         | Ets2          | 2.38        |
| Fibronectin                                  | <td>3.61</td> | 3.61        |
| Growth Arrest & DNA-damage Inducible Alpha   | Gadd45a       | 0.24        |
| Inhibitor of DNA-binding 1                   | Id1           | 0.42        |
| Interferon Gamma                             | Infg          | 0.09        |
| Insulin Growth Factor 1                      | Igf1          | 0.01        |
| Insulin Growth Factor-binding Protein 5      | Igfbp5        | 0.01        |
| Interferon Regulatory Factor 3               | Irf3          | 1.91        |
| Interferon Regulatory Factor 5               | Irf5          | 15.03       |
| Interferon Regulatory Factor 7               | Irf7          | 6.91        |
| Mouse Double Minute 2                        | Mdm2          | 1.99        |
| MORC3                                        | Morc3         | 1.99        |
| Myc                                          | Myc           | 9.10        |
| NADPH Oxidase 4                              | Nox4          | 2.89        |
| Proliferating Cell Nuclear Antigen           | Pcna          | 3.39        |
| Urokinase                                    | Plau          | 0.20        |
| Phosphatase & Tensin Homolog                 | Pten          | 0.38        |
| Retinoblastoma-like Protein 1                | Rbl1          | 2.55        |
| Superoxide Dismutase 1                       | Sod1          | 4.82        |
| Secreted Protein Acidic & Cysteine Rich      | Sparc         | 0.18        |
| T-box Transcription Factor 2                 | Tbx2          | 2.44        |
| T-box Transcription Factor 3                 | Tbx3          | 45.67       |
| Telomeric Repeat Binding Factor 2            | Terf2         | 1.89        |
| Telomerase                                   | Tert          | 12.22       |
| Tumor protein 53                             | Trp53         | 0.01        |
| Twist BHLH Transcription Factor 1            | Twist1        | 1.82        |

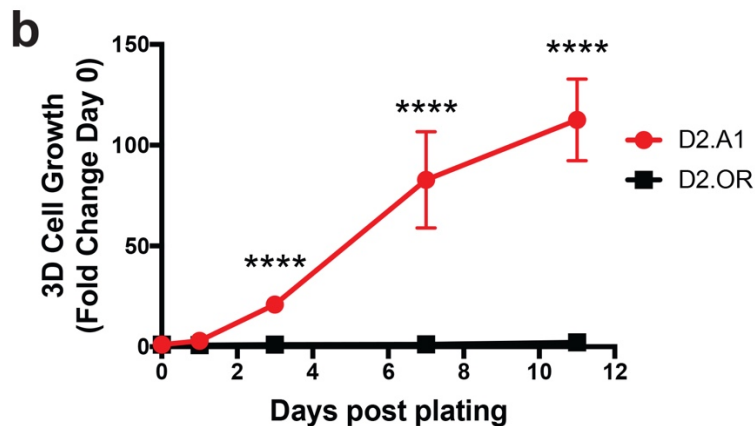

Supplementary Figure 1. D2.OR cells remain dormant in a 3D tissue culture system and express numerous senescence associated genes. **a** Senescence-associated genes are differentially expressed between dormant D2.OR and metastatic D2.A1 cells. Data are gene expression levels in D2.A1 cells normalized to D2.OR cells using a 1.5-fold cut-off. **b** D2.OR cells exhibit minimal

outgrowth in 3D-cultures as compared to their metastatic D2.A1 counterparts. Data represent mean ( $\pm$ STDEV) of biological replicates performed in triplicate ( $****P\leq 0.0001$ ). This experiment was independently repeated for a total of 3 experiments, all with similar results.



**Supplementary Figure 2: Flynn et al.**

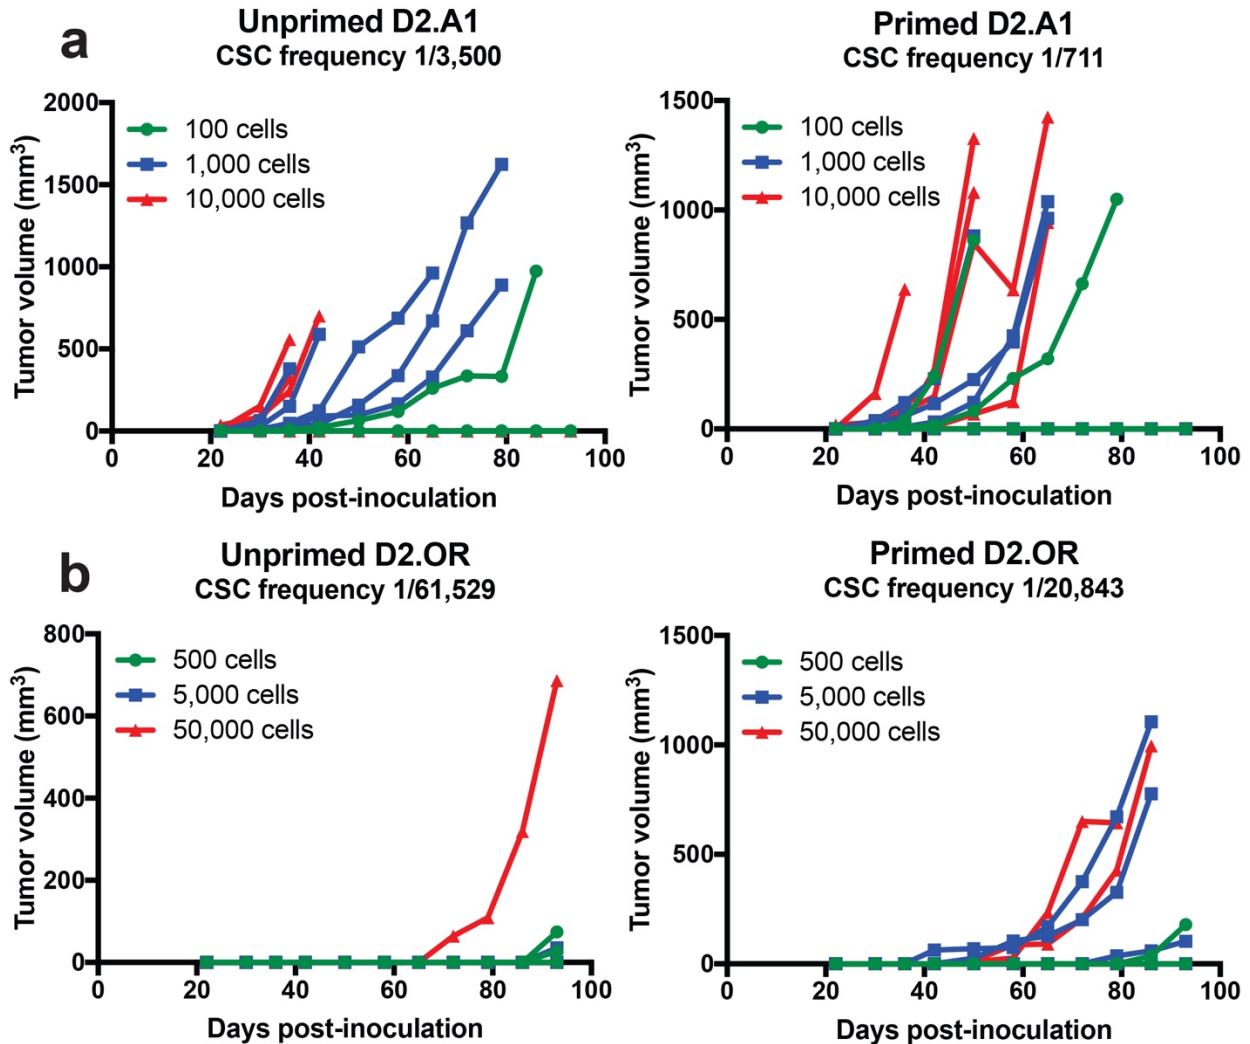

**Supplementary Figure 2.** Priming increases the stem cell frequency and decreases the latency of mammary fat pad tumor formation *in vivo*. D2.OR and D2.A1 primed and unprimed cells were inoculated into the mammary fat pads of BALB/C mice (Fig. 1). **a** Metastatic D2.A1 cells exhibit early outgrowth from the mammary fat pad. **b** Priming of dormant D2.OR cells decreases tumor latency while increasing stem cell frequency as determined by ELDA: Extreme Limiting Dilution Analysis <http://bioinf.wehi.edu.au/software/elda/>. The ELDA software uses a test to evaluate differences between population groups (analogous to one-way ANOVA) in Fig. 1C. Data represent n=5 mice/group.

Supplementary Figure 3: Flynn et al

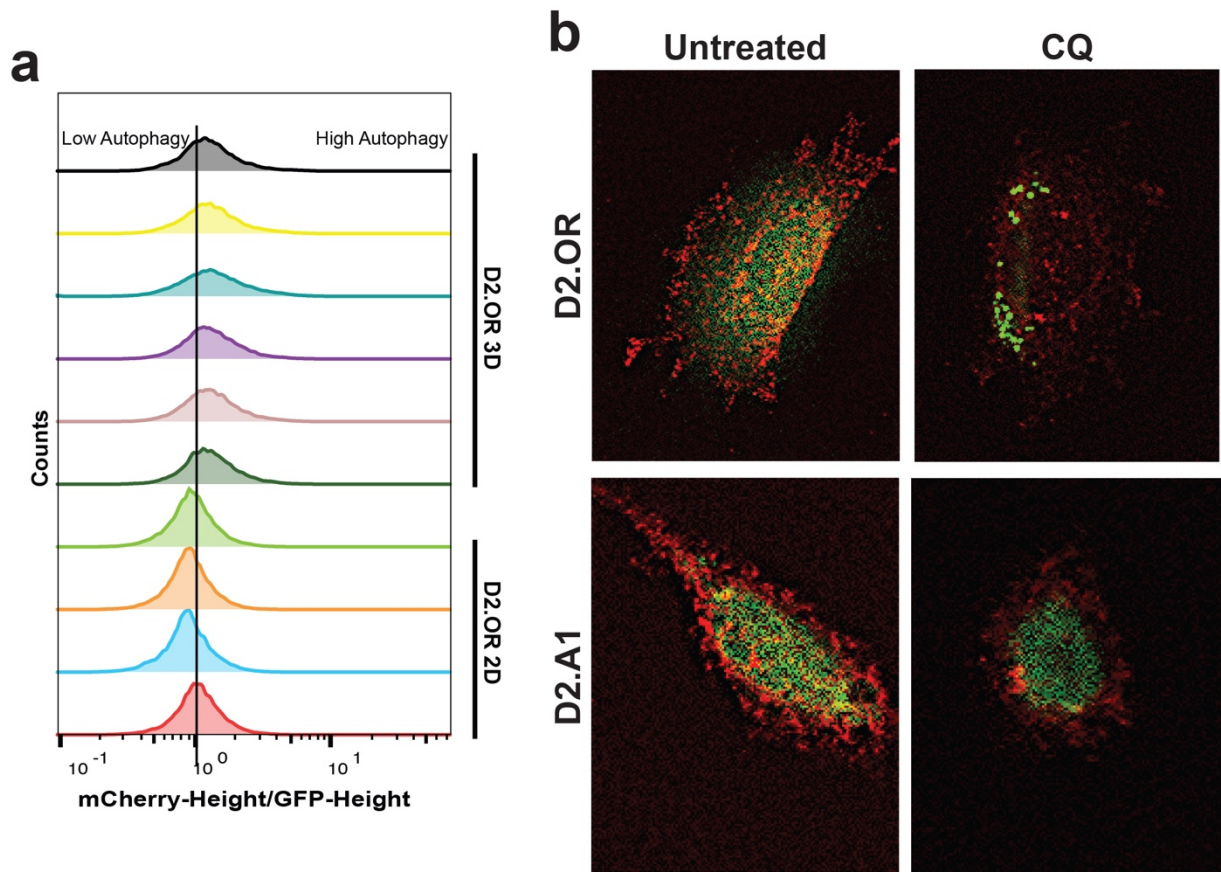

**Supplementary Figure 3.** Measuring autophagic flux in dormant cells. **a** Autophagy flux mCherry-Height:GFP-Height ratio in “primed” D2.OR (3D) and “unprimed” D2.OR (2D) cells. **b** Immunofluorescence of LAMP1 (green) and LC3B (red) colocalization in dormant D2.OR and metastatic D2.A1 cells untreated and treated with chloroquine (50  $\mu$ M; CQ).

Supplementary Figure 4: Flynn et al

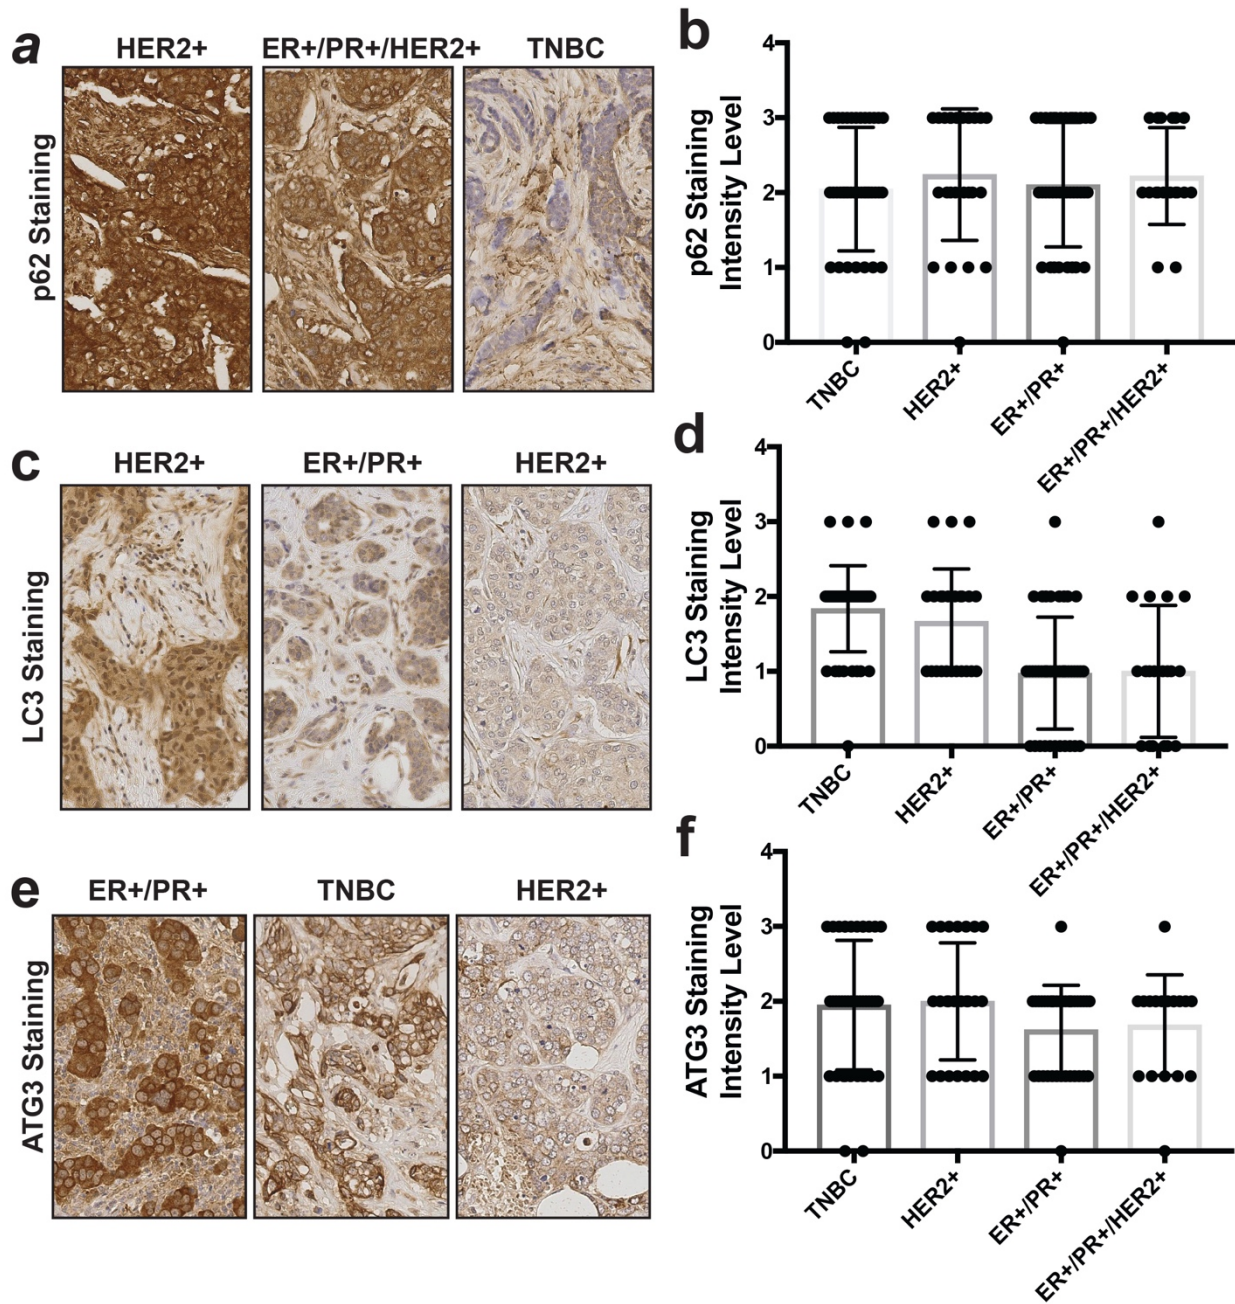

**Supplementary Figure 4.** Assessing autophagy status in human breast cancer tumor samples. The Case Comprehensive Cancer Center Breast Cancer TMA was stained for p62/SQSTM1, LC3 and ATG3. Representative IHC staining for these antigens are shown in panels **a**, **c**, and **e**. Quantification of staining intensity levels of each of the cores on the TMA are highlighted in panels **b**, **d** and **f**. 100 breast cancer sample cores were evaluated for each antigen.

**Supplementary Figure 5: Flynn et al**

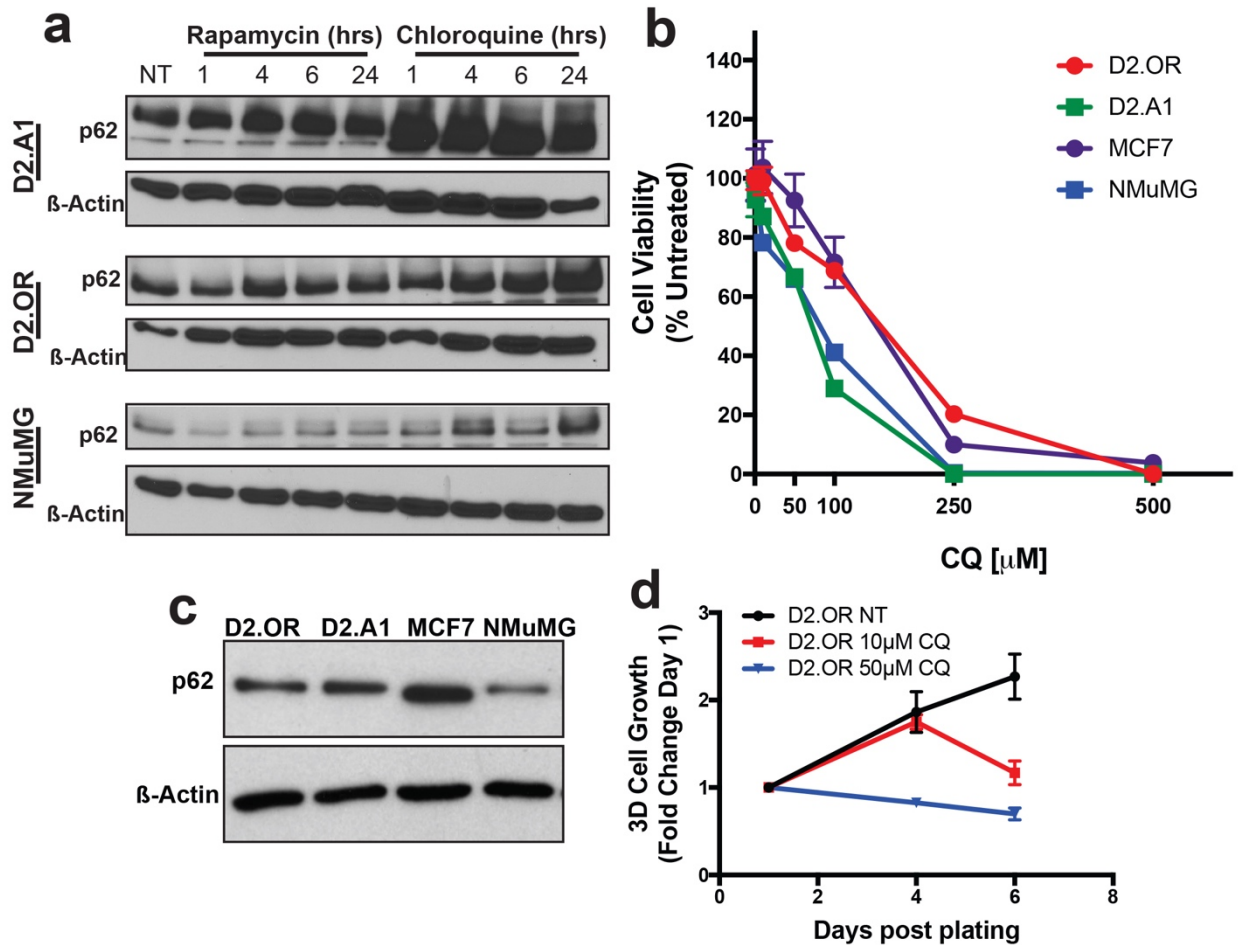

**Supplementary Figure 5.** Modulating autophagy in dormant cells. Genetic inhibition of autophagy in dormant cells. **a** NMuMG, D2.OR, and D2.A1 cells were incubated in the absence (NT) or presence of either rapamycin (50 nM) or chloroquine (CQ) (10  $\mu$ M) for 0-24 hours (hrs) as indicated. Alterations in p62/ SQSTM1 expression was monitored by immunoblotting. **b** D2.OR, D2.A1, MCF7, and NMuMG cells were incubated in the absence or presence of the autophagy inhibitor, chloroquine (CQ) under serum reduced (1%) conditions as indicated. Differences in cell viability were quantified by CellTiter-Glo Assay. Data are the mean ( $\pm$  S.E.M; n=3). **c** NMuMG cells are highly autophagic, while MCF7 cells exhibit low levels of basal autophagy. **d** Growth of dormant D2.OR cells in the absence or presence of 10  $\mu$ M or 50  $\mu$ M CQ in 3D-culture systems.

**Supplementary Figure 6: Flynn et al**

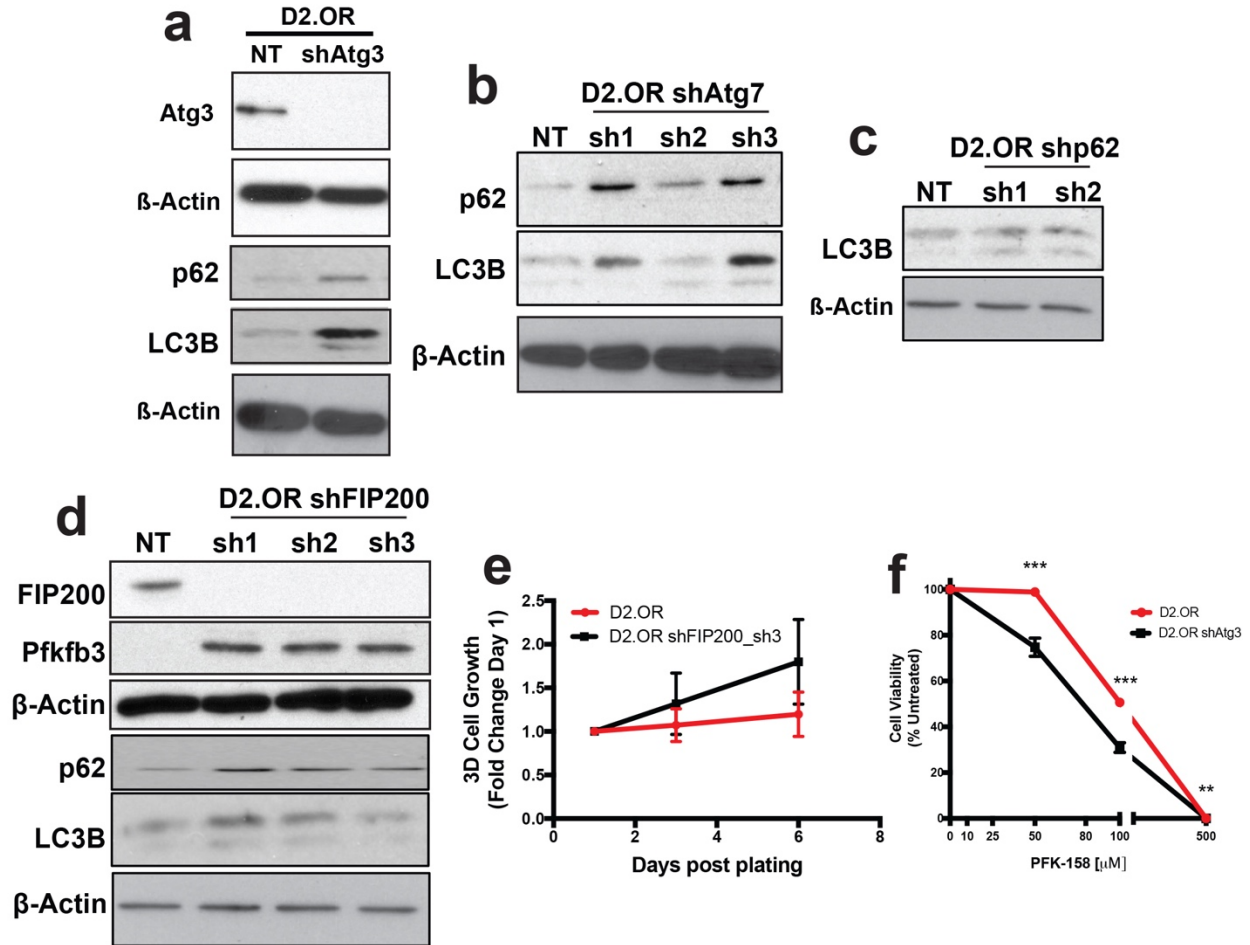

**Supplementary Figure 6:** Autophagy inhibition in dormant D2.OR cells. Depleting the expression of Atg3 (**a**; shAtg3), Atg7 (**b**; shAtg7), p62/ SQSTM1 (**c**; shp62), and FIP200 (**d**; shFIP200) inhibits autophagy as determined by immunoblotting for p62/SQSTM1 and LC3B. **d** FIP200-deficiency promotes aberrant Pfkfb3 expression in D2.OR cells and **e**, induces their outgrowth in 3D-cultures. Data represent mean ( $\pm$ STDEV) of biological replicates performed in triplicate. This experiment was independently repeated for a total of three experiments, all with similar results. (**e**). **f** Depleting Atg3 expression renders D2.OR cells more sensitive to the Pfkfb3 inhibitor, PFK158. Data represent mean ( $\pm$ STDEV) of biological replicates performed in triplicate (\*\*  $P \leq 0.01$  and \*\*\* $P \leq 0.001$ ). This experiment was independently repeated for a total of 3 experiments, all with similar results.

Supplementary Figure 7: Flynn et al

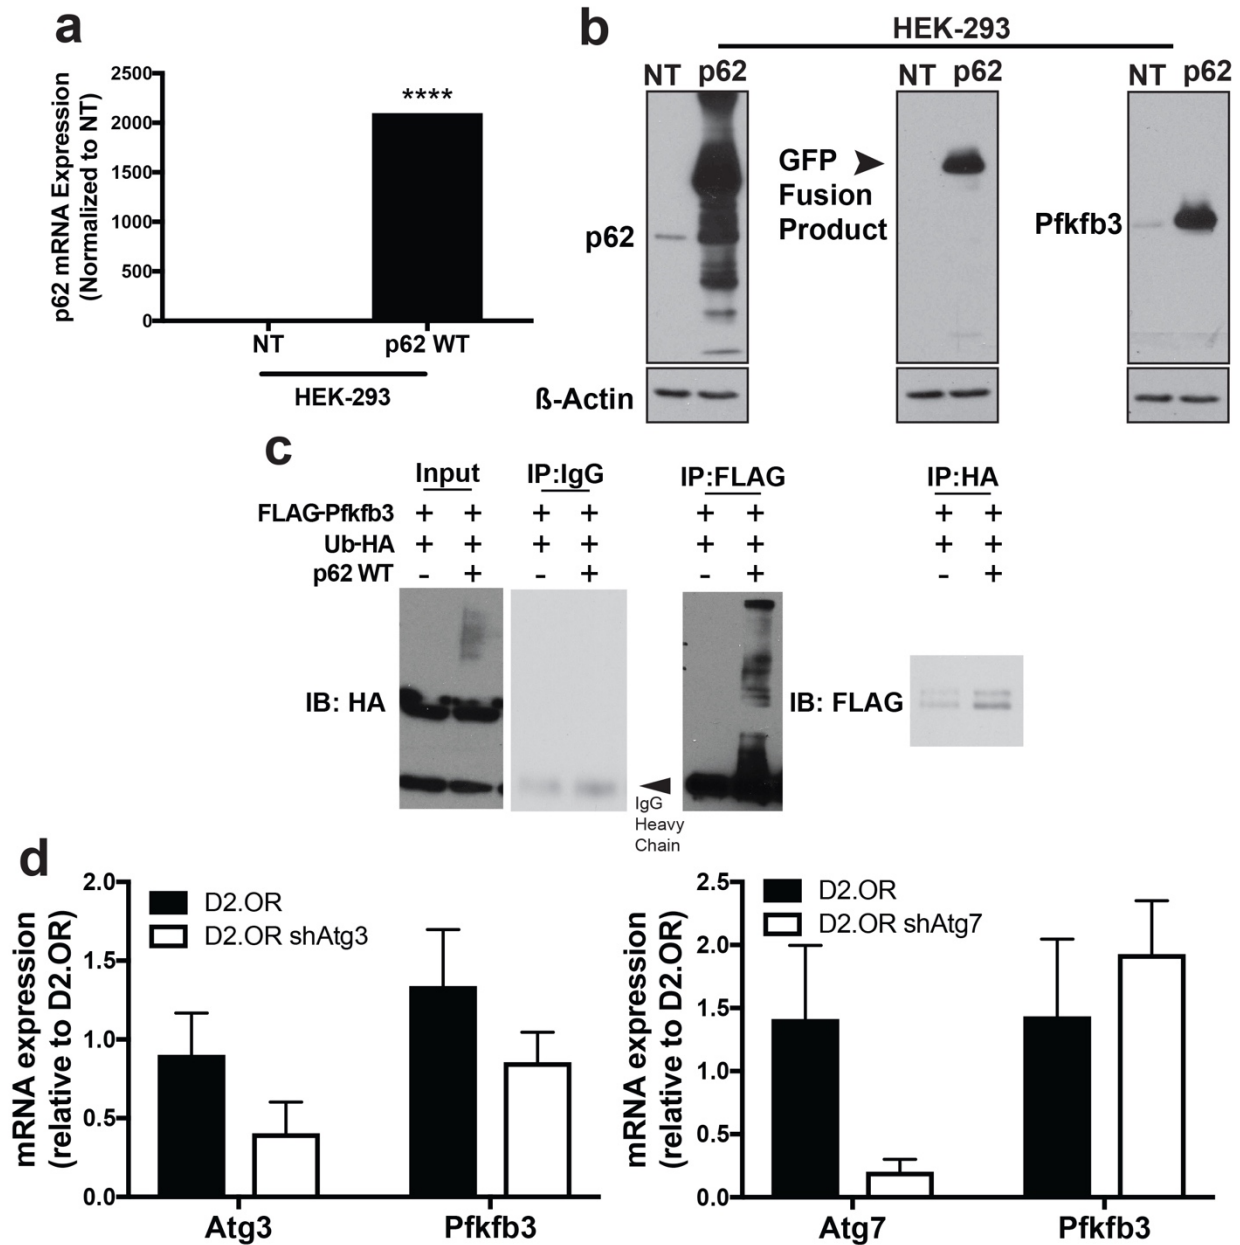

**Supplementary Figure 7.** p62/SQSTM1 binds to ubiquitinated Pfkfb3. HEK-293 cells were transiently transfected with empty vector or p62/ SQSTM1 fused to GFP (pDestEGFP-p62). **a** p62 mRNA expression. Data represent mean ( $\pm$ STDEV) of replicates performed in triplicate (\*\*\*\*  $P < 0.0001$ ). This experiment was independently repeated for a total of 3 experiments, all with similar results. **b** Alterations in p62/SQSTM1, GFP, and Pfkfb3 expression were monitored by immunoblotting. **c** Immunoblot (IB) analysis of HEK-293 cells transiently transfected with FLAG-tagged Pfkfb3, HA-tagged Ubiquitin (Ub-HA), or GFP-tagged p62/SQSTM1 mutants. Subsequently, anti-FLAG immunocomplexes were captured and immunoblotted with antibodies against FLAG or HA as indicated. **d** Knockdown of Atg3 and Atg7 does not significantly impact the expression levels of Pfkfb3 mRNA after 8 passages following autophagy inactivation.

# Supplementary Figure 8: Flynn et al

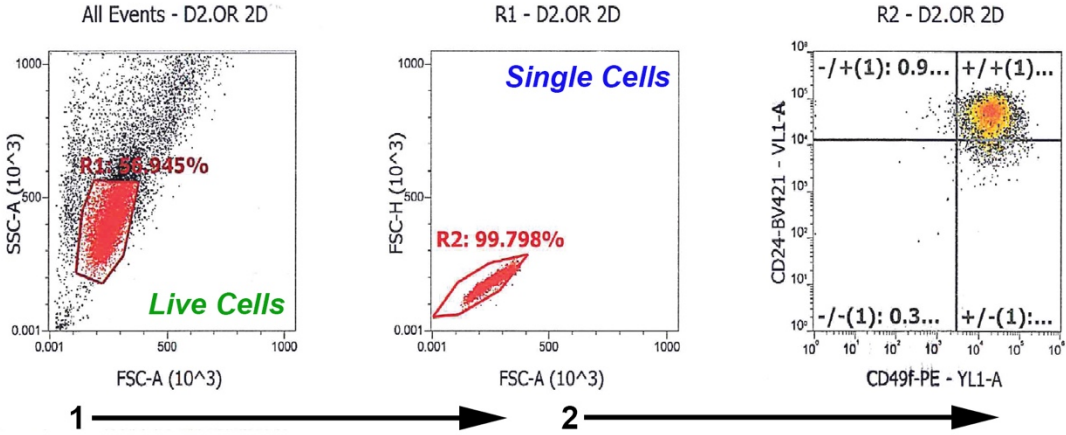

Supplementary Figure 8. Gating strategy.





Figure 6a

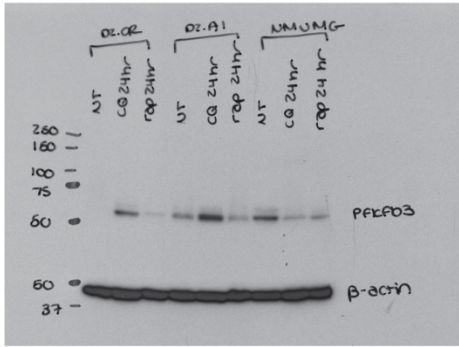

Figure 6b

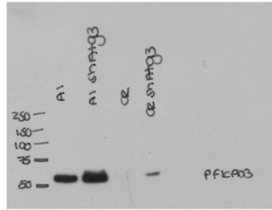

Figure 6b

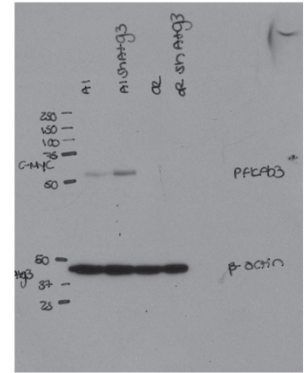

Figure 6c

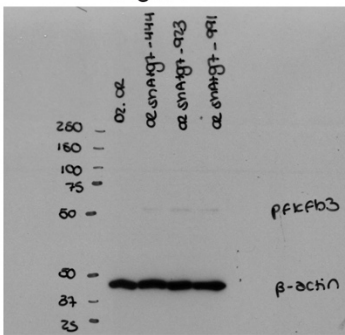

Figure 6c

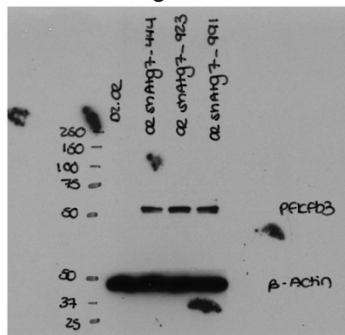

Figure 6c

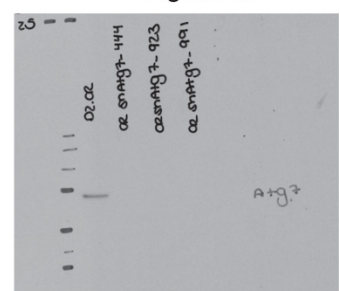

Figure 6d

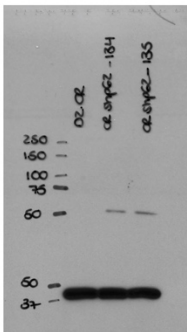

Figure 6d

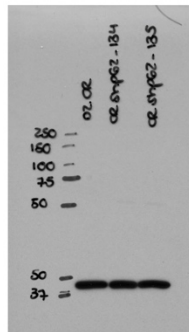

Figure 6d

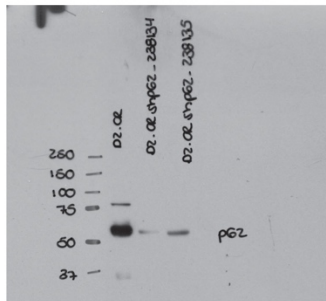

Figure 7c

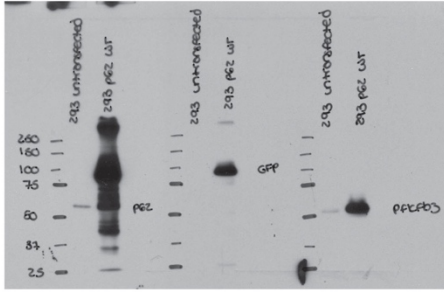

Figure 7c

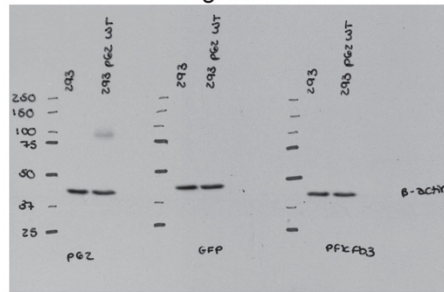

Figure 7d

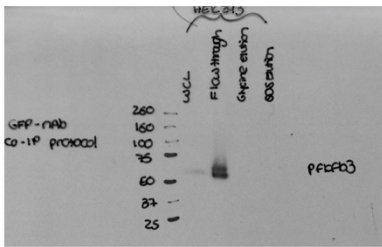

Figure 7d

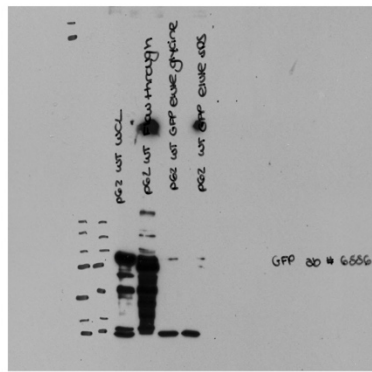

Figure 7d

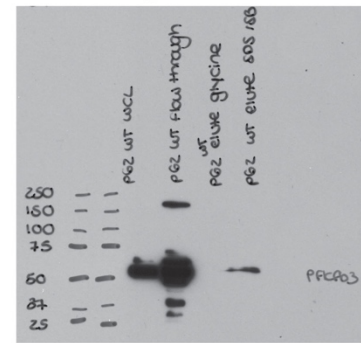

Figure 7e

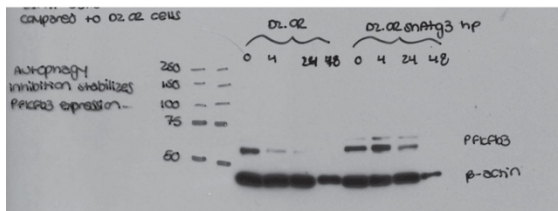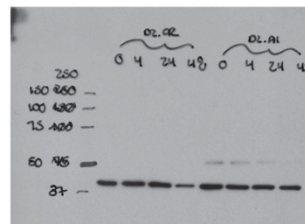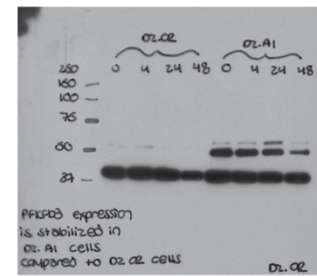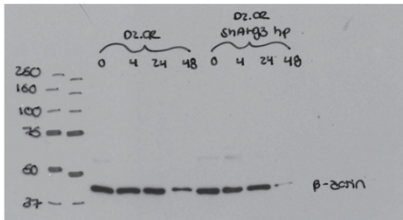

Figure 7f

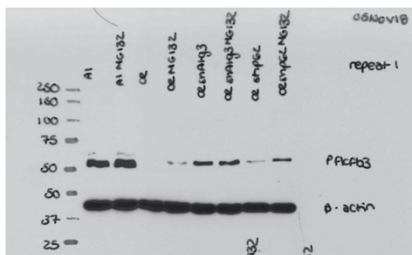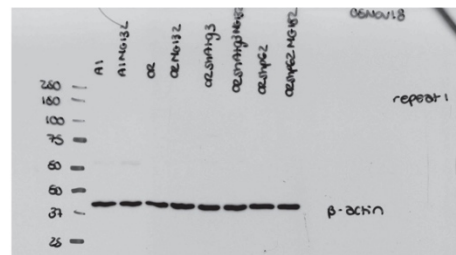

Supplementary Figure 6a

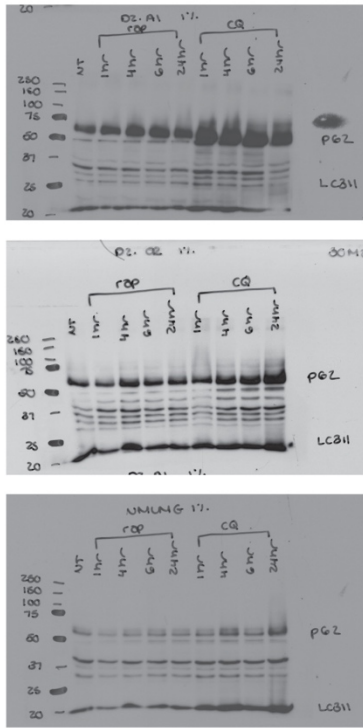

Supplementary Figure 6a

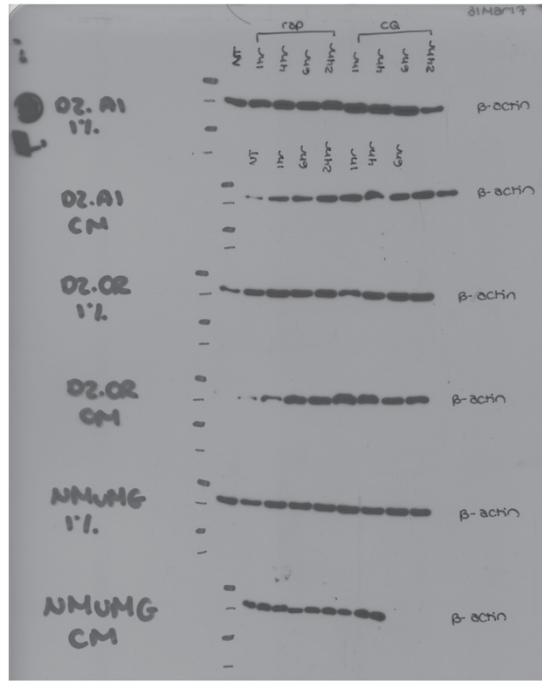

Supplementary Figure 6c

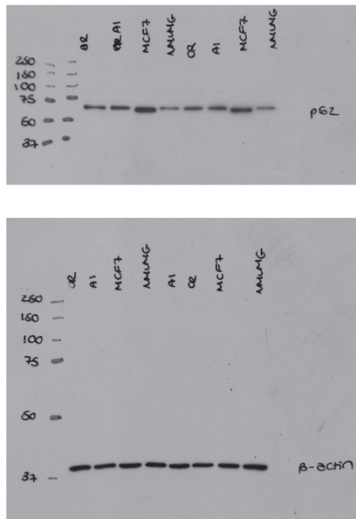

Supplementary Figure 6d

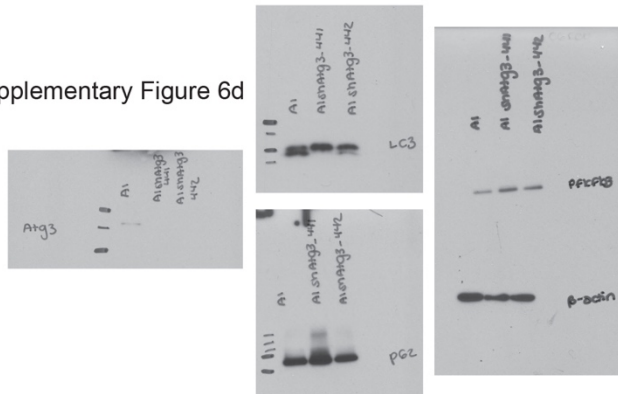

Supplementary Figure 6e

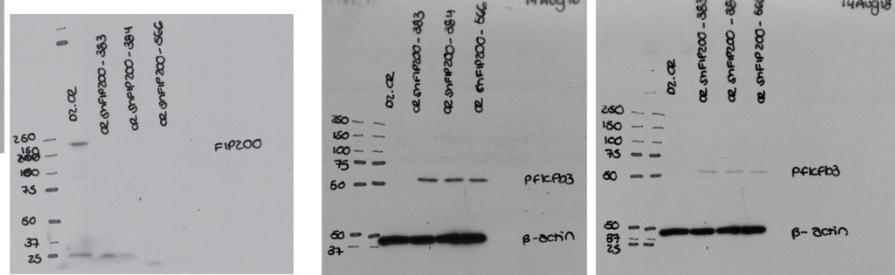

Supplement: 41467_2019_11640_MOESM1_ESM.pdf [file 41467_2019_11640_MOESM1_ESM.pdf]
