# Supplementary material for: Autophagy inhibition elicits emergence from metastatic dormancy by inducing and stabilizing Pfkfb3 expression
Source: PubMed Central journal article supplement (PMC6694140; doi:10.1038/s41467-019-11640-9), 2019-08-14
Supplement: 41467_2019_11640_MOESM2_ESM.pdf [file 41467_2019_11640_MOESM2_ESM.pdf]

## Reporting Summary

Nature Research wishes to improve the reproducibility of the work that we publish. This form provides structure for consistency and transparency in reporting. For further information on Nature Research policies, see [Authors & Referees](#) and the [Editorial Policy Checklist](#).

### Statistics

For all statistical analyses, confirm that the following items are present in the figure legend, table legend, main text, or Methods section.

n/a Confirmed

- The exact sample size ( $n$ ) for each experimental group/condition, given as a discrete number and unit of measurement
- A statement on whether measurements were taken from distinct samples or whether the same sample was measured repeatedly
- The statistical test(s) used AND whether they are one- or two-sided  
*Only common tests should be described solely by name; describe more complex techniques in the Methods section.*
- A description of all covariates tested
- A description of any assumptions or corrections, such as tests of normality and adjustment for multiple comparisons
- A full description of the statistical parameters including central tendency (e.g. means) or other basic estimates (e.g. regression coefficient) AND variation (e.g. standard deviation) or associated estimates of uncertainty (e.g. confidence intervals)
- For null hypothesis testing, the test statistic (e.g.  $F$ ,  $t$ ,  $r$ ) with confidence intervals, effect sizes, degrees of freedom and  $P$  value noted  
*Give  $P$  values as exact values whenever suitable.*
- For Bayesian analysis, information on the choice of priors and Markov chain Monte Carlo settings
- For hierarchical and complex designs, identification of the appropriate level for tests and full reporting of outcomes
- Estimates of effect sizes (e.g. Cohen's  $d$ , Pearson's  $r$ ), indicating how they were calculated

*Our web collection on [statistics for biologists](#) contains articles on many of the points above.*

### Software and code

Policy information about [availability of computer code](#)

Data collection

Keyence, Attune, GloxMax, Ivis Spectrum

Data analysis

Image J (NIH; Version:2.0.0-rc-43/1.50e), Prism 7 (Version 7.0d), Ingenuity Pathway Analysis, Microsoft Excel, Attune NxT Version 3.1

For manuscripts utilizing custom algorithms or software that are central to the research but not yet described in published literature, software must be made available to editors/reviewers. We strongly encourage code deposition in a community repository (e.g. GitHub). See the Nature Research [guidelines for submitting code & software](#) for further information.

### Data

Policy information about [availability of data](#)

All manuscripts must include a [data availability statement](#). This statement should provide the following information, where applicable:

- Accession codes, unique identifiers, or web links for publicly available datasets
- A list of figures that have associated raw data
- A description of any restrictions on data availability

We have provided this information in the Data Availability statement

### Field-specific reporting

Please select the one below that is the best fit for your research. If you are not sure, read the appropriate sections before making your selection.

- Life sciences       Behavioural & social sciences       Ecological, evolutionary & environmental sciences

For a reference copy of the document with all sections, see [nature.com/documents/nr-reporting-summary-flat.pdf](http://nature.com/documents/nr-reporting-summary-flat.pdf)

## Life sciences study design

All studies must disclose on these points even when the disclosure is negative.

|                 |                                                                                                                                                                                                                                                        |
|-----------------|--------------------------------------------------------------------------------------------------------------------------------------------------------------------------------------------------------------------------------------------------------|
| Sample size     | All quantitative experiments were repeated three times unless otherwise noted. Student t-tests were used for pair-wise comparison.                                                                                                                     |
| Data exclusions | Data points were not excluded from analysis                                                                                                                                                                                                            |
| Replication     | Independent replicates were repeated as noted.                                                                                                                                                                                                         |
| Randomization   | For breast cancer xenograft studies, the mice were randomized into (i) 4 groups (n=3 per group) for priming analyses; (ii) 12 groups (n=5 per group) for limiting-dilution assays (LDA); and (iii) 2 groups (n=10 per group) for Atg3-deficient cells. |
| Blinding        | Analysis of immunohistochemistry experiments were performed in a blinded fashion.                                                                                                                                                                      |

## Reporting for specific materials, systems and methods

We require information from authors about some types of materials, experimental systems and methods used in many studies. Here, indicate whether each material, system or method listed is relevant to your study. If you are not sure if a list item applies to your research, read the appropriate section before selecting a response.

### Materials & experimental systems

| n/a                                 | Involvement in the study                                        |
|-------------------------------------|-----------------------------------------------------------------|
| <input type="checkbox"/>            | <input checked="" type="checkbox"/> Antibodies                  |
| <input type="checkbox"/>            | <input checked="" type="checkbox"/> Eukaryotic cell lines       |
| <input checked="" type="checkbox"/> | <input type="checkbox"/> Palaeontology                          |
| <input type="checkbox"/>            | <input checked="" type="checkbox"/> Animals and other organisms |
| <input type="checkbox"/>            | <input checked="" type="checkbox"/> Human research participants |
| <input checked="" type="checkbox"/> | <input type="checkbox"/> Clinical data                          |

### Methods

| n/a                                 | Involvement in the study                           |
|-------------------------------------|----------------------------------------------------|
| <input checked="" type="checkbox"/> | <input type="checkbox"/> ChIP-seq                  |
| <input type="checkbox"/>            | <input checked="" type="checkbox"/> Flow cytometry |
| <input checked="" type="checkbox"/> | <input type="checkbox"/> MRI-based neuroimaging    |

## Antibodies

|                 |                                                                                                |
|-----------------|------------------------------------------------------------------------------------------------|
| Antibodies used | All antibodies are described in Supplementary Table 5                                          |
| Validation      | All antibodies were obtained from commercial sources where they had previously been validated. |

## Eukaryotic cell lines

Policy information about [cell lines](#)

|                                                                      |                                                                                                                         |
|----------------------------------------------------------------------|-------------------------------------------------------------------------------------------------------------------------|
| Cell line source(s)                                                  | Cell line information can be found in Methods subsection "Cell culture and reagents"                                    |
| Authentication                                                       | Cell lines were purchased from and authenticated by ATCC.                                                               |
| Mycoplasma contamination                                             | All cell lines tested negative for mycoplasma contamination. Please see Methods subsection: "Cell culture and reagents" |
| Commonly misidentified lines<br>(See <a href="#">ICLAC</a> register) | N/A                                                                                                                     |

## Animals and other organisms

Policy information about [studies involving animals](#); [ARRIVE guidelines](#) recommended for reporting animal research

|                         |                                                                                                                                              |
|-------------------------|----------------------------------------------------------------------------------------------------------------------------------------------|
| Laboratory animals      | 4-6 week old BALB/c mice were purchased from JAX labs.                                                                                       |
| Wild animals            | N/A                                                                                                                                          |
| Field-collected samples | N/A                                                                                                                                          |
| Ethics oversight        | Animal studies were approved under Protocol #2013-1020 by the Institutional Animal Care and Use Committee of Case Western Reserve University |

Note that full information on the approval of the study protocol must also be provided in the manuscript.

## Human research participants

Policy information about [studies involving human research participants](#)

|                            |                                                                                                                                   |
|----------------------------|-----------------------------------------------------------------------------------------------------------------------------------|
| Population characteristics | De-identified human breast cancer samples were assembled into a TMA. Age, sex, and race were all collected as part of this study. |
| Recruitment                | N/A                                                                                                                               |
| Ethics oversight           | Human breast cancer tissues were collected in accordance with the following IRB approved protocols: CASE 01-13-43C and CASE 7114. |

Note that full information on the approval of the study protocol must also be provided in the manuscript.

## Flow Cytometry

### Plots

Confirm that:

- The axis labels state the marker and fluorochrome used (e.g. CD4-FITC).
- The axis scales are clearly visible. Include numbers along axes only for bottom left plot of group (a 'group' is an analysis of identical markers).
- All plots are contour plots with outliers or pseudocolor plots.
- A numerical value for number of cells or percentage (with statistics) is provided.

### Methodology

|                           |                                                                                                                                                                                                                                                                                                                       |
|---------------------------|-----------------------------------------------------------------------------------------------------------------------------------------------------------------------------------------------------------------------------------------------------------------------------------------------------------------------|
| Sample preparation        | D2.A1 and D2.OR cells were obtained from Fred Miller as documented in the Methods subsection "Cell culture and reagents". Cells were harvested with Accutase and stained according to the protocol detailed in Methods subsection "CD49f/CD24 flow cytometry"                                                         |
| Instrument                | Attune NxT Flow Cytometer                                                                                                                                                                                                                                                                                             |
| Software                  | Attune NxT Software Version 3.1                                                                                                                                                                                                                                                                                       |
| Cell population abundance | 10,000 cells were analyzed for each sample type.                                                                                                                                                                                                                                                                      |
| Gating strategy           | Live (SSC-A and FSC-A) and single cells (FSC-A and FSC-H) were preliminarily gated. CD49f/CD24 gating is largely subjective and as such, upon selection of a gating strategy, gates remained static for all experiments. Gates were originally drawn on untreated D2.OR cell populations. See "Supplementary Fig. 8". |

- Tick this box to confirm that a figure exemplifying the gating strategy is provided in the Supplementary Information.
